# Supplementary material for: A thorium metallacyclopentadiene complex: a combined experimental and computational study
Source: Royal Society of Chemistry journal article supplement (doi:10.1039/c5dt00838g), 2015-01-01
Supplement: c5dt00838g1.pdf [file c5dt00838g1.pdf]

*Supporting Information for*

# A Thorium Metallacyclopentadiene Complex: A Combined Experimental and Computational Study

Bo Fang, Guohua Hou, Guofu Zi,\* De-Cai Fang,\* and Marc D. Walter\*

**Table S1.** The optimized Cartesian Coordinates (in Å) and structures (the hydrogen atoms omitted for clarity) of stationary points for **2**+Me<sub>3</sub>SiCHN<sub>2</sub>, obtained with B3PW91-PCM+D3 method.

| Species  | Cartesian coordinates |          |          |          |  |
|----------|-----------------------|----------|----------|----------|--|
| <b>2</b> | C                     | -1.33992 | 2.49129  | 0.92437  |  |
|          | C                     | 0.00000  | 2.85439  | 1.24166  |  |
|          | C                     | 0.24755  | 2.47784  | 2.59294  |  |
|          | C                     | -0.93988 | 1.87975  | 3.10299  |  |
|          | C                     | -1.92356 | 1.89793  | 2.07449  |  |
|          | C                     | -2.01418 | 2.85918  | -0.36085 |  |
|          | H                     | -2.14023 | 3.94881  | -0.43271 |  |
|          | H                     | -3.00160 | 2.40144  | -0.44240 |  |
|          | H                     | -1.42715 | 2.53477  | -1.22734 |  |
|          | C                     | 0.85509  | 3.68492  | 0.32778  |  |
|          | H                     | 0.33377  | 4.61672  | 0.07063  |  |
|          | H                     | 1.07741  | 3.16153  | -0.60883 |  |
|          | H                     | 1.80934  | 3.96052  | 0.78478  |  |
|          | C                     | 1.50949  | 2.69343  | 3.38259  |  |
|          | H                     | 2.17422  | 3.40649  | 2.88556  |  |
|          | H                     | 2.09390  | 1.77205  | 3.53740  |  |
|          | H                     | 1.28594  | 3.09245  | 4.37862  |  |
|          | C                     | -1.15944 | 1.39445  | 4.50716  |  |
|          | H                     | -0.21374 | 1.23467  | 5.03377  |  |
|          | H                     | -1.71682 | 0.44873  | 4.53983  |  |
|          | H                     | -1.74338 | 2.11957  | 5.09062  |  |
|          | C                     | -3.35039 | 1.46741  | 2.24758  |  |
|          | H                     | -3.91367 | 2.22064  | 2.81582  |  |
|          | H                     | -3.43425 | 0.52347  | 2.79993  |  |
|          | H                     | -3.85374 | 1.31711  | 1.28970  |  |
|          | C                     | 3.32889  | 1.38969  | 0.49156  |  |
|          | H                     | 2.61275  | 1.92533  | 1.10622  |  |
|          | C                     | 4.68737  | 1.52261  | 0.76493  |  |
|          | H                     | 5.01176  | 2.15679  | 1.58716  |  |
|          | C                     | 5.62233  | 0.82933  | -0.00123 |  |
|          | H                     | 6.68480  | 0.91495  | 0.21236  |  |
|          | C                     | 5.17319  | 0.01746  | -1.04698 |  |
|          | H                     | 5.89055  | -0.53358 | -1.65151 |  |
|          | C                     | 3.81608  | -0.09502 | -1.33012 |  |
|          | H                     | 3.49343  | -0.72997 | -2.14791 |  |
|          | C                     | 2.84596  | 0.58755  | -0.56189 |  |
|          | C                     | 1.39483  | 0.39539  | -0.69488 |  |
|          | C                     | 0.72419  | 0.18438  | -1.87283 |  |
|          | C                     | 1.41311  | 0.28812  | -3.19334 |  |
|          | C                     | 1.46788  | -0.80207 | -4.07327 |  |
|          | H                     | 0.95695  | -1.72402 | -3.80819 |  |
|          | C                     | 2.16431  | -0.71216 | -5.27574 |  |
| H        | 2.20080               | -1.57006 | -5.94324 |          |  |
| C        | 2.80801               | 0.47549  | -5.62674 |          |  |
| H        | 3.34730               | 0.54757  | -6.56820 |          |  |
| C        | 2.75173               | 1.57034  | -4.76393 |          |  |
| H        | 3.24842               | 2.50069  | -5.02981 |          |  |
| C        | 2.06295               | 1.47414  | -3.55736 |          |  |
| H        | 2.03100               | 2.31963  | -2.87455 |          |  |
| Th       | 0.00000               | 0.00000  | 1.30686  |          |  |
| C        | -3.32889              | -1.38969 | 0.49156  |          |  |
| H        | -2.61275              | -1.92533 | 1.10622  |          |  |

|                                    |                                                                                                                                                                                                                                                                                                                                                                                                                                                                                                                                                                                                                                                                                                                                                                                                                                                                                                                                                                                                                                                                                                                                                                                                                                                                                                                                                                                                                                                                                                                |                                                                                      |
|------------------------------------|----------------------------------------------------------------------------------------------------------------------------------------------------------------------------------------------------------------------------------------------------------------------------------------------------------------------------------------------------------------------------------------------------------------------------------------------------------------------------------------------------------------------------------------------------------------------------------------------------------------------------------------------------------------------------------------------------------------------------------------------------------------------------------------------------------------------------------------------------------------------------------------------------------------------------------------------------------------------------------------------------------------------------------------------------------------------------------------------------------------------------------------------------------------------------------------------------------------------------------------------------------------------------------------------------------------------------------------------------------------------------------------------------------------------------------------------------------------------------------------------------------------|--------------------------------------------------------------------------------------|
|                                    | C -4.68737 -1.52261 0.76493<br>H -5.01176 -2.15679 1.58716<br>C -5.62233 -0.82933 -0.00123<br>H -6.68480 -0.91495 0.21236<br>C -5.17319 -0.01746 -1.04698<br>H -5.89055 0.53358 -1.65151<br>C -3.81608 0.09502 -1.33012<br>H -3.49343 0.72997 -2.14791<br>C -2.84596 -0.58755 -0.56189<br>C -1.39483 -0.39539 -0.69488<br>C -0.72419 -0.18438 -1.87283<br>C -1.41311 -0.28812 -3.19334<br>C -1.46788 0.80207 -4.07327<br>H -0.95695 1.72402 -3.80819<br>C -2.16431 0.71216 -5.27574<br>H -2.20080 1.57006 -5.94324<br>C -2.80801 -0.47549 -5.62674<br>H -3.34730 -0.54757 -6.56820<br>C -2.75173 -1.57034 -4.76393<br>H -3.24842 -2.50069 -5.02981<br>C -2.06295 -1.47414 -3.55736<br>H -2.03100 -2.31963 -2.87455<br>C 1.33992 -2.49129 0.92437<br>C 0.00000 -2.85439 1.24166<br>C -0.24755 -2.47784 2.59294<br>C 0.93988 -1.87975 3.10299<br>C 1.92356 -1.89793 2.07449<br>C 2.01418 -2.85918 -0.36085<br>H 2.14023 -3.94881 -0.43271<br>H 3.00160 -2.40144 -0.44240<br>H 1.42715 -2.53477 -1.22734<br>C -0.85509 -3.68492 0.32778<br>H -0.33377 -4.61672 0.07063<br>H -1.07741 -3.16153 -0.60883<br>H -1.80934 -3.96052 0.78478<br>C -1.50949 -2.69343 3.38259<br>H -2.17422 -3.40649 2.88556<br>H -2.09390 -1.77205 3.53740<br>H -1.28594 -3.09245 4.37862<br>C 1.15944 -1.39445 4.50716<br>H 0.21374 -1.23467 5.03377<br>H 1.71682 -0.44873 4.53983<br>H 1.74338 -2.11957 5.09062<br>C 3.35039 -1.46741 2.24758<br>H 3.91367 -2.22064 2.81582<br>H 3.43425 -0.52347 2.79993<br>H 3.85374 -1.31711 1.28970 |                                                                                      |
| Me <sub>3</sub> SiCHN <sub>2</sub> | C 4.44157 1.47888 -0.26779<br>H 4.12656 2.43605 -0.67754<br>C 6.15206 -0.87627 0.53259<br>H 5.47436 -1.57112 0.02294<br>H 5.82492 -0.78938 1.57529<br>H 7.15239 -1.32502 0.53263<br>C 7.34776 1.98881 0.57603<br>H 8.38347 1.62982 0.52811<br>H 7.07019 2.08869 1.63141<br>H 7.32024 2.98773 0.12451<br>C 6.74064 0.63191 -2.11638                                                                                                                                                                                                                                                                                                                                                                                                                                                                                                                                                                                                                                                                                                                                                                                                                                                                                                                                                                                                                                                                                                                                                                             | 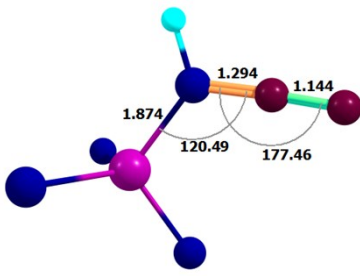 |

|             |                              |  |
|-------------|------------------------------|--|
|             | H 6.10253 -0.07404 -2.65981  |  |
|             | H 7.77472 0.26930 -2.17155   |  |
|             | H 6.69726 1.59549 -2.63799   |  |
|             | N 2.68385 0.16133 0.78908    |  |
|             | N 3.49062 0.79879 0.28754    |  |
|             | Si 6.18811 0.80255 -0.32120  |  |
| <b>COM3</b> | C 1.77062 -2.41787 -1.81407  |  |
|             | C 1.08315 -1.41845 -2.56106  |  |
|             | C -0.29194 -1.77537 -2.61395 |  |
|             | C -0.45217 -3.01416 -1.93019 |  |
|             | C 0.81792 -3.39560 -1.41619  |  |
|             | C 3.25738 -2.53845 -1.64318  |  |
|             | H 3.53800 -2.82369 -0.62236  |  |
|             | H 3.76542 -1.59828 -1.87833  |  |
|             | H 3.66755 -3.30695 -2.31268  |  |
|             | C 1.71347 -0.29891 -3.33342  |  |
|             | H 2.15291 -0.67554 -4.26800  |  |
|             | H 2.50846 0.20624 -2.77689   |  |
|             | H 0.96944 0.45527 -3.60601   |  |
|             | C -1.35552 -1.00855 -3.34518 |  |
|             | H -2.35077 -1.38670 -3.10142 |  |
|             | H -1.22123 -1.07803 -4.43351 |  |
|             | H -1.34205 0.05429 -3.07403  |  |
|             | C -1.65446 -3.91071 -1.97934 |  |
|             | H -2.58094 -3.36061 -2.15401 |  |
|             | H -1.78955 -4.47714 -1.05362 |  |
|             | H -1.53377 -4.63918 -2.79397 |  |
|             | C 1.12995 -4.69746 -0.73984  |  |
|             | H 1.33732 -5.48531 -1.47813  |  |
|             | H 0.29710 -5.04758 -0.12179  |  |
|             | H 2.01329 -4.62148 -0.09710  |  |
|             | C 1.52757 -1.88410 2.41776   |  |
|             | C 1.33998 -0.48515 2.61701   |  |
|             | C -0.04267 -0.25937 2.83123  |  |
|             | C -0.70653 -1.51548 2.81901  |  |
|             | C 0.26015 -2.52536 2.56053   |  |
|             | C 2.85376 -2.56496 2.23922   |  |
|             | H 3.34217 -2.75871 3.20447   |  |
|             | H 3.54481 -1.95599 1.64732   |  |
|             | H 2.75418 -3.52985 1.73146   |  |
|             | C 2.42010 0.54354 2.77500    |  |
|             | H 2.22107 1.45755 2.20672    |  |
|             | H 3.39455 0.16343 2.45453    |  |
|             | H 2.51746 0.83159 3.83066    |  |
|             | C -0.71564 1.02524 3.20075   |  |
|             | H -1.60714 1.19124 2.58663   |  |
|             | H -0.05390 1.88327 3.06743   |  |
|             | H -1.03682 1.00923 4.25239   |  |
|             | C -2.11197 -1.69124 3.31385  |  |
|             | H -2.18199 -1.34736 4.35556  |  |
|             | H -2.43112 -2.73697 3.29639  |  |
|             | H -2.83243 -1.10983 2.72875  |  |
|             | C 0.02218 -4.00815 2.65775   |  |
|             | H 0.84941 -4.58118 2.22993   |  |
|             | H -0.89295 -4.31991 2.13904  |  |
|             | H -0.08072 -4.31621 3.70693  |  |
|             | C -2.26465 -0.50143 -0.09588 |  |
|             | C -2.51596 0.84506 -0.10322  |  |

|   |          |          |          |
|---|----------|----------|----------|
| C | -1.40679 | 1.84675  | -0.15786 |
| C | -0.08362 | 1.50120  | -0.27465 |
| C | -3.33251 | -1.50122 | -0.27753 |
| C | -3.32713 | -2.70878 | 0.44642  |
| H | -2.53433 | -2.87725 | 1.16748  |
| C | -4.28498 | -3.69847 | 0.24575  |
| H | -4.24663 | -4.61095 | 0.83732  |
| C | -5.26717 | -3.53608 | -0.72979 |
| H | -6.00910 | -4.31178 | -0.90254 |
| C | -5.27187 | -2.36681 | -1.49445 |
| H | -6.02049 | -2.22871 | -2.27192 |
| C | -4.33137 | -1.36724 | -1.26755 |
| H | -4.35911 | -0.46312 | -1.86696 |
| C | -3.91281 | 1.38243  | -0.08155 |
| C | -4.77192 | 1.05061  | 0.97324  |
| H | -4.39783 | 0.41492  | 1.77165  |
| C | -6.08520 | 1.51408  | 1.00320  |
| H | -6.73401 | 1.24530  | 1.83387  |
| C | -6.56683 | 2.31768  | -0.02985 |
| H | -7.59174 | 2.68067  | -0.00981 |
| C | -5.72241 | 2.65461  | -1.08900 |
| H | -6.08805 | 3.28076  | -1.89980 |
| C | -4.40862 | 2.19534  | -1.11097 |
| H | -3.75285 | 2.46843  | -1.93320 |
| C | -1.80139 | 3.29094  | -0.06214 |
| C | -2.40820 | 3.79215  | 1.09664  |
| H | -2.62995 | 3.11424  | 1.91586  |
| C | -2.74655 | 5.13872  | 1.20254  |
| H | -3.21588 | 5.50632  | 2.11242  |
| C | -2.49167 | 6.01158  | 0.14458  |
| H | -2.75927 | 7.06260  | 0.22451  |
| C | -1.89527 | 5.52391  | -1.01811 |
| H | -1.69471 | 6.19400  | -1.85116 |
| C | -1.55259 | 4.17770  | -1.11724 |
| H | -1.08115 | 3.80086  | -2.02054 |
| C | 0.91611  | 2.58617  | -0.34027 |
| C | 1.24291  | 3.37888  | 0.77503  |
| H | 0.69954  | 3.22356  | 1.70143  |
| C | 2.20139  | 4.38724  | 0.69814  |
| H | 2.42158  | 4.98461  | 1.58039  |
| C | 2.85852  | 4.64949  | -0.50568 |
| H | 3.59724  | 5.44459  | -0.57046 |
| C | 2.54254  | 3.87943  | -1.62792 |
| H | 3.03723  | 4.07197  | -2.57767 |
| C | 1.59887  | 2.85922  | -1.53994 |
| H | 1.35854  | 2.26959  | -2.41807 |
| C | 4.48558  | 1.49044  | -0.07543 |
| H | 4.26694  | 2.55681  | -0.01058 |
| C | 6.16768  | -0.93413 | 0.66864  |
| H | 5.47465  | -1.61014 | 0.15527  |
| H | 5.85289  | -0.85229 | 1.71504  |
| H | 7.15883  | -1.40278 | 0.64859  |
| C | 7.33950  | 1.95858  | 0.73553  |
| H | 8.38152  | 1.61959  | 0.69711  |
| H | 7.05127  | 2.05418  | 1.78833  |
| H | 7.29463  | 2.95457  | 0.27956  |
| C | 6.72376  | 0.56486  | -1.97074 |
| H | 6.04159  | -0.11025 | -2.50111 |

|            |                              |  |
|------------|------------------------------|--|
|            | H 7.73663 0.15088 -2.05090   |  |
|            | H 6.71023 1.53087 -2.48808   |  |
|            | N 2.52339 0.07293 -0.20285   |  |
|            | N 3.44393 0.75668 -0.14589   |  |
|            | Si 6.21579 0.75139 -0.16640  |  |
|            | Th 0.19273 -1.04265 0.08439  |  |
| <b>TS3</b> | C 1.81302 -2.72533 -1.57121  |  |
|            | C 1.13591 -1.81027 -2.41920  |  |
|            | C -0.23608 -2.17862 -2.46498 |  |
|            | C -0.40700 -3.34335 -1.66933 |  |
|            | C 0.85656 -3.67374 -1.09908  |  |
|            | C 3.29068 -2.72515 -1.30954  |  |
|            | H 3.57313 -3.48403 -0.57478  |  |
|            | H 3.63906 -1.75213 -0.93939  |  |
|            | H 3.85424 -2.93286 -2.22896  |  |
|            | C 1.75847 -0.75213 -3.27912  |  |
|            | H 1.87018 -1.11724 -4.31035  |  |
|            | H 2.74740 -0.46284 -2.91659  |  |
|            | H 1.14581 0.15526 -3.31250   |  |
|            | C -1.25026 -1.51703 -3.35032 |  |
|            | H -2.22929 -1.99050 -3.25916 |  |
|            | H -0.94105 -1.57591 -4.40278 |  |
|            | H -1.37873 -0.45505 -3.10541 |  |
|            | C -1.62412 -4.21973 -1.61794 |  |
|            | H -2.53073 -3.68281 -1.90402 |  |
|            | H -1.80173 -4.62645 -0.61704 |  |
|            | H -1.50234 -5.07307 -2.30006 |  |
|            | C 1.15255 -4.95377 -0.37426  |  |
|            | H 1.38478 -5.75770 -1.08784  |  |
|            | H 0.29735 -5.29154 0.21991   |  |
|            | H 2.01160 -4.86513 0.29746   |  |
|            | C 1.64572 -2.06014 2.48028   |  |
|            | C 1.60285 -0.64227 2.59120   |  |
|            | C 0.27017 -0.26978 2.90602   |  |
|            | C -0.51480 -1.44903 2.98760  |  |
|            | C 0.33238 -2.56364 2.72503   |  |
|            | C 2.90549 -2.85982 2.32041   |  |
|            | H 3.46038 -2.90380 3.26769   |  |
|            | H 3.58214 -2.42137 1.57846   |  |
|            | H 2.70405 -3.89044 2.01717   |  |
|            | C 2.78347 0.27910 2.53530    |  |
|            | H 2.51623 1.26291 2.13906    |  |
|            | H 3.57800 -0.11360 1.89488   |  |
|            | H 3.21529 0.42574 3.53558    |  |
|            | C -0.21044 1.09603 3.29566   |  |
|            | H -0.72686 1.61289 2.48310   |  |
|            | H 0.62693 1.72614 3.61115    |  |
|            | H -0.90745 1.03176 4.13996   |  |
|            | C -1.91752 -1.47444 3.52311  |  |
|            | H -1.92676 -1.14563 4.57223  |  |
|            | H -2.34947 -2.47919 3.50270  |  |
|            | H -2.58595 -0.80797 2.96643  |  |
|            | C -0.04241 -4.00501 2.92989  |  |
|            | H 0.63243 -4.68171 2.40106   |  |
|            | H -1.05999 -4.22140 2.58289  |  |
|            | H 0.00014 -4.26912 3.99520   |  |
|            | C -2.08579 -0.42647 -0.13834 |  |
|            | C -2.28840 0.92057 -0.23508  |  |

|   |          |          |          |
|---|----------|----------|----------|
| C | -1.21264 | 1.94726  | -0.09959 |
| C | 0.14336  | 1.79764  | -0.11189 |
| C | -3.18272 | -1.39221 | -0.35174 |
| C | -3.35681 | -2.46279 | 0.54248  |
| H | -2.68789 | -2.54668 | 1.39316  |
| C | -4.35757 | -3.41636 | 0.36747  |
| H | -4.46471 | -4.22236 | 1.09026  |
| C | -5.20148 | -3.34915 | -0.73882 |
| H | -5.97669 | -4.09639 | -0.88886 |
| C | -5.03080 | -2.31112 | -1.65914 |
| H | -5.67686 | -2.24693 | -2.53210 |
| C | -4.04804 | -1.34650 | -1.46522 |
| H | -3.94331 | -0.53729 | -2.18004 |
| C | -3.65815 | 1.47501  | -0.48947 |
| C | -4.70750 | 1.21549  | 0.39946  |
| H | -4.50675 | 0.62448  | 1.28951  |
| C | -5.99139 | 1.69143  | 0.14710  |
| H | -6.79315 | 1.48112  | 0.85131  |
| C | -6.24962 | 2.43190  | -1.00653 |
| H | -7.25207 | 2.80297  | -1.20610 |
| C | -5.21213 | 2.69555  | -1.90178 |
| H | -5.40337 | 3.27279  | -2.80358 |
| C | -3.92764 | 2.22515  | -1.64111 |
| H | -3.11821 | 2.43810  | -2.33533 |
| C | -1.73308 | 3.33366  | 0.19643  |
| C | -2.40373 | 3.56560  | 1.40423  |
| H | -2.56988 | 2.73665  | 2.08715  |
| C | -2.88401 | 4.83236  | 1.72634  |
| H | -3.40155 | 4.98847  | 2.67014  |
| C | -2.70889 | 5.89341  | 0.83835  |
| H | -3.08355 | 6.88357  | 1.08645  |
| C | -2.05776 | 5.67112  | -0.37488 |
| H | -1.92484 | 6.48809  | -1.08037 |
| C | -1.57741 | 4.40293  | -0.69230 |
| H | -1.07520 | 4.23649  | -1.63987 |
| C | 1.01677  | 2.97830  | -0.06695 |
| C | 1.41207  | 3.59183  | 1.12971  |
| H | 1.01274  | 3.22621  | 2.06849  |
| C | 2.29459  | 4.66918  | 1.11908  |
| H | 2.59426  | 5.12799  | 2.05856  |
| C | 2.79053  | 5.16317  | -0.08906 |
| H | 3.48414  | 6.00022  | -0.09452 |
| C | 2.37532  | 4.58459  | -1.29089 |
| H | 2.74570  | 4.96950  | -2.23810 |
| C | 1.50520  | 3.50002  | -1.27773 |
| H | 1.20471  | 3.02492  | -2.20842 |
| C | 3.78860  | 1.56516  | -0.45468 |
| H | 3.60208  | 2.58469  | -0.11077 |
| C | 6.13013  | -0.25932 | 0.46176  |
| H | 5.49833  | -1.15522 | 0.43927  |
| H | 6.09799  | 0.14905  | 1.47839  |
| H | 7.16068  | -0.57452 | 0.25538  |
| C | 6.59491  | 2.58174  | -0.68214 |
| H | 7.65392  | 2.37385  | -0.87422 |
| H | 6.51459  | 3.02723  | 0.31671  |
| H | 6.25932  | 3.33128  | -1.40865 |
| C | 5.67620  | 0.27010  | -2.53577 |
| H | 5.09910  | -0.65811 | -2.61108 |

|          |                                                                                                                                                                                                                                                                                                                                                                                                                                                                                                                                                                                                                                                                                                                                                                                                                                                                                                                                                                                                                                                                                                                                                                                                                                                                                                                                                                                                                                                                                                                                                                                                                                                |  |
|----------|------------------------------------------------------------------------------------------------------------------------------------------------------------------------------------------------------------------------------------------------------------------------------------------------------------------------------------------------------------------------------------------------------------------------------------------------------------------------------------------------------------------------------------------------------------------------------------------------------------------------------------------------------------------------------------------------------------------------------------------------------------------------------------------------------------------------------------------------------------------------------------------------------------------------------------------------------------------------------------------------------------------------------------------------------------------------------------------------------------------------------------------------------------------------------------------------------------------------------------------------------------------------------------------------------------------------------------------------------------------------------------------------------------------------------------------------------------------------------------------------------------------------------------------------------------------------------------------------------------------------------------------------|--|
|          | H 6.71879 0.03496 -2.78397<br>H 5.29469 0.96516 -3.29265<br>N 1.61823 0.43573 -0.57641<br>N 2.80222 0.75438 -0.60851<br>Si 5.55106 1.01656 -0.80686<br>Th 0.24666 -1.22948 0.19484                                                                                                                                                                                                                                                                                                                                                                                                                                                                                                                                                                                                                                                                                                                                                                                                                                                                                                                                                                                                                                                                                                                                                                                                                                                                                                                                                                                                                                                             |  |
| <b>3</b> | C 3.24001 -1.25255 -1.89393<br>C 2.34543 -0.29843 -2.45920<br>C 1.12147 -0.96354 -2.75537<br>C 1.26926 -2.33078 -2.40495<br>C 2.55648 -2.49794 -1.82392<br>C 4.70673 -1.07584 -1.60933<br>H 4.96728 -1.24459 -0.55612<br>H 5.04983 -0.07320 -1.87300<br>H 5.29500 -1.79155 -2.19786<br>C 2.65889 1.11008 -2.86636<br>H 2.82533 1.17263 -3.95079<br>H 3.55775 1.48528 -2.37309<br>H 1.84458 1.79845 -2.61942<br>C -0.07911 -0.33581 -3.40094<br>H -0.99299 -0.88363 -3.15124<br>H 0.01398 -0.30566 -4.49594<br>H -0.22331 0.69211 -3.05090<br>C 0.38058 -3.45453 -2.83507<br>H -0.62520 -3.11081 -3.07799<br>H 0.28185 -4.23502 -2.07708<br>H 0.80006 -3.92207 -3.73765<br>C 3.13991 -3.80263 -1.36433<br>H 3.56369 -4.37542 -2.20187<br>H 2.38023 -4.44073 -0.89594<br>H 3.94607 -3.65231 -0.63731<br>C 2.75615 -1.45789 2.38138<br>C 2.31357 -0.12159 2.57914<br>C 0.90788 -0.14933 2.78224<br>C 0.48629 -1.50598 2.77916<br>C 1.63100 -2.31740 2.52034<br>C 4.17764 -1.92361 2.24877<br>H 4.59312 -2.22086 3.22221<br>H 4.82877 -1.14033 1.84589<br>H 4.26181 -2.79442 1.58771<br>C 3.18501 1.07008 2.81783<br>H 2.75054 1.98035 2.39752<br>H 4.18440 0.94504 2.39547<br>H 3.30684 1.23607 3.89739<br>C 0.03120 1.03303 3.07326<br>H -0.96853 0.90403 2.64474<br>H 0.44657 1.95223 2.64663<br>H -0.08532 1.19262 4.15477<br>C -0.88603 -1.94181 3.20068<br>H -1.01035 -1.81243 4.28474<br>H -1.09167 -2.98944 2.96657<br>H -1.65336 -1.34118 2.70329<br>C 1.73179 -3.81780 2.56715<br>H 2.09179 -4.25258 1.62425<br>H 0.76882 -4.28381 2.79640<br>H 2.43744 -4.13069 3.34779<br>C -1.34323 -1.24494 -0.11177<br>C -2.39873 -0.36470 -0.00673 |  |



|   |          |          |          |
|---|----------|----------|----------|
| C | -2.29783 | 1.10596  | 0.01065  |
| C | -1.13009 | 1.82540  | -0.11954 |
| C | -1.59447 | -2.68116 | -0.34542 |
| C | -0.80143 | -3.63903 | 0.31676  |
| H | -0.08485 | -3.30039 | 1.05660  |
| C | -0.94637 | -5.01106 | 0.11209  |
| H | -0.31932 | -5.70542 | 0.66730  |
| C | -1.89115 | -5.48022 | -0.79686 |
| H | -2.01835 | -6.54681 | -0.96334 |
| C | -2.66466 | -4.55298 | -1.50344 |
| H | -3.39370 | -4.90117 | -2.23209 |
| C | -2.51544 | -3.18841 | -1.29159 |
| H | -3.12192 | -2.49357 | -1.86192 |
| C | -3.80980 | -0.88648 | 0.03820  |
| C | -4.22579 | -1.71556 | 1.08555  |
| H | -3.51718 | -1.97098 | 1.86768  |
| C | -5.51997 | -2.23095 | 1.12511  |
| H | -5.81985 | -2.87158 | 1.95151  |
| C | -6.42503 | -1.93086 | 0.10827  |
| H | -7.43527 | -2.33233 | 0.13616  |
| C | -6.02201 | -1.11175 | -0.94776 |
| H | -6.71702 | -0.87395 | -1.74996 |
| C | -4.73078 | -0.59370 | -0.97802 |
| H | -4.42407 | 0.04552  | -1.80133 |
| C | -3.56031 | 1.89181  | 0.15771  |
| C | -4.26379 | 1.84709  | 1.36863  |
| H | -3.88898 | 1.21724  | 2.17170  |
| C | -5.43245 | 2.58314  | 1.54403  |
| H | -5.96367 | 2.53483  | 2.49183  |
| C | -5.92116 | 3.37898  | 0.50709  |
| H | -6.83443 | 3.95361  | 0.64204  |
| C | -5.23170 | 3.42999  | -0.70413 |
| H | -5.60480 | 4.04582  | -1.51926 |
| C | -4.06299 | 2.69201  | -0.87540 |
| H | -3.52375 | 2.73583  | -1.81789 |
| C | -1.13780 | 3.29532  | -0.35793 |
| C | -1.55851 | 4.20841  | 0.61586  |
| H | -1.94378 | 3.83403  | 1.55967  |
| C | -1.47878 | 5.57807  | 0.37692  |
| H | -1.80312 | 6.27815  | 1.14300  |
| C | -0.98285 | 6.05273  | -0.83895 |
| H | -0.91675 | 7.12246  | -1.02127 |
| C | -0.57939 | 5.14803  | -1.82213 |
| H | -0.19938 | 5.50935  | -2.77468 |
| C | -0.65883 | 3.77847  | -1.58314 |
| H | -0.32844 | 3.06943  | -2.33825 |
| C | 1.71504  | 2.84691  | 0.21210  |
| H | 0.95842  | 3.61093  | 0.38855  |
| C | 3.76781  | 4.64576  | 1.55343  |
| H | 3.82347  | 4.09065  | 2.49626  |
| H | 2.96372  | 5.38612  | 1.64380  |
| H | 4.71063  | 5.19240  | 1.42818  |
| C | 3.48018  | 4.56942  | -1.48689 |
| H | 4.42327  | 5.12202  | -1.58135 |
| H | 2.65952  | 5.29617  | -1.45862 |
| H | 3.35050  | 3.95659  | -2.38540 |
| C | 4.75820  | 2.13510  | -0.00942 |
| H | 5.44487  | 2.18373  | 0.84234  |

|    |         |          |          |
|----|---------|----------|----------|
| H  | 5.35591 | 2.20496  | -0.92491 |
| H  | 4.27299 | 1.15392  | 0.00304  |
| N  | 0.06720 | 1.14769  | -0.14310 |
| N  | 1.32138 | 1.63306  | -0.03913 |
| Si | 3.46483 | 3.50750  | 0.07731  |
| Th | 1.16514 | -0.87283 | 0.05751  |

**Table S2.** Frequencies of the stationary points optimized for **2**+Me<sub>3</sub>SiCHN<sub>2</sub>, obtained with B3PW91-PCM+D3 method.

| Species                            | Frequencies (cm <sup>-1</sup> )                                                                                                                                                                                                                                                                                                                                                                                                                                                                                                                                                                                                                                                                                                                                                                                                                                                                                                                                                                                                                                                                                                                                                                                                                                                                                                                                                                                                                                                                                                                                                                                                                                    |
|------------------------------------|--------------------------------------------------------------------------------------------------------------------------------------------------------------------------------------------------------------------------------------------------------------------------------------------------------------------------------------------------------------------------------------------------------------------------------------------------------------------------------------------------------------------------------------------------------------------------------------------------------------------------------------------------------------------------------------------------------------------------------------------------------------------------------------------------------------------------------------------------------------------------------------------------------------------------------------------------------------------------------------------------------------------------------------------------------------------------------------------------------------------------------------------------------------------------------------------------------------------------------------------------------------------------------------------------------------------------------------------------------------------------------------------------------------------------------------------------------------------------------------------------------------------------------------------------------------------------------------------------------------------------------------------------------------------|
| <b>2</b>                           | 22 24 36 40 46 48 50 56 57 65 67 73 81 82<br>90 94 97 107 112 114 120 121 133 138 148 148 160 163<br>171 172 173 180 185 186 190 195 199 203 207 211 215 217<br>228 236 252 271 279 282 283 292 298 300 300 305 307 314<br>318 357 378 386 400 402 412 412 414 429 429 459 500 501<br>534 540 552 553 554 555 556 567 568 604 604 607 624 627<br>627 629 632 634 634 639 639 644 701 710 716 716 720 720<br>747 771 782 790 802 817 822 823 833 833 856 856 862 862<br>873 924 924 926 927 966 967 969 975 976 978 979 986 986<br>992 992 995 996 1014 1014 1016 1017 1048 1049 1054 1058 1058 1060<br>1060 1063 1065 1066 1068 1068 1073 1073 1089 1092 1093 1096 1097 1116<br>1116 1119 1124 1127 1128 1193 1193 1194 1194 1196 1196 1197 1198 1200<br>1217 1217 1223 1224 1239 1286 1292 1337 1338 1340 1345 1372 1373 1375<br>1376 1424 1424 1425 1425 1434 1437 1439 1441 1442 1446 1451 1453 1460<br>1462 1475 1475 1482 1483 1487 1488 1488 1490 1492 1492 1494 1501 1504<br>1504 1506 1508 1509 1511 1511 1517 1518 1519 1526 1529 1529 1532 1534<br>1534 1537 1539 1543 1544 1546 1561 1562 1586 1628 1628 1643 1643 1660<br>1660 1668 1669 3008 3008 3033 3033 3037 3037 3038 3038 3044 3044 3084<br>3084 3091 3091 3094 3094 3106 3106 3109 3109 3135 3138 3140 3141 3147<br>3147 3161 3161 3170 3170 3182 3182 3183 3183 3190 3190 3190 3191 3201<br>3201 3208 3208 3210 3210 3215 3215 3231 3231 3236 3236                                                                                                                                                                                                                                            |
| Me <sub>3</sub> SiCHN <sub>2</sub> | 29 109 140 153 164 165 187 215 224 274 440 497 578 613<br>693 695 700 714 779 797 877 883 892 1201 1311 1314 1323 1339<br>1475 1478 1479 1487 1489 1496 2227 3047 3048 3052 3129 3131 3138 3139<br>3140 3140 3194                                                                                                                                                                                                                                                                                                                                                                                                                                                                                                                                                                                                                                                                                                                                                                                                                                                                                                                                                                                                                                                                                                                                                                                                                                                                                                                                                                                                                                                  |
| <b>COM3</b>                        | 11 25 28 30 33 37 43 43 52 57 58 63 64 72<br>74 76 83 86 89 99 101 105 111 114 114 122 127 128<br>138 141 144 147 152 158 161 163 166 168 170 171 179 179<br>180 186 193 198 200 204 214 219 225 228 228 235 240 245<br>249 254 258 264 275 280 285 288 292 294 299 304 306 309<br>316 322 325 365 379 384 392 397 412 415 417 423 435 465<br>484 488 498 515 534 542 552 552 555 557 559 562 564 566<br>606 612 612 614 620 627 630 631 631 633 635 637 640 643<br>684 697 701 703 711 712 713 715 718 719 738 770 777 782<br>787 798 800 813 825 827 831 834 852 854 855 859 864 881<br>883 888 912 920 921 923 962 963 964 968 972 974 978 982<br>986 987 988 988 989 1015 1017 1017 1018 1047 1048 1054 1054 1054<br>1057 1058 1061 1064 1064 1065 1067 1067 1071 1089 1094 1097 1099 1100<br>1108 1116 1117 1122 1129 1132 1191 1193 1195 1195 1196 1197 1198 1199<br>1201 1210 1213 1217 1219 1223 1236 1274 1289 1313 1314 1323 1326 1336<br>1340 1344 1369 1370 1373 1375 1376 1420 1422 1423 1424 1429 1431 1433<br>1434 1438 1442 1453 1454 1460 1461 1474 1476 1476 1477 1479 1483 1485<br>1486 1487 1487 1487 1491 1491 1492 1496 1497 1499 1502 1504 1506 1510<br>1512 1513 1514 1515 1516 1521 1525 1527 1528 1530 1532 1534 1536 1537<br>1539 1546 1550 1553 1554 1559 1578 1627 1629 1643 1645 1658 1664 1669<br>1670 2234 3034 3035 3036 3037 3037 3037 3038 3039 3040 3043 3048 3053<br>3055 3096 3096 3097 3102 3107 3107 3111 3112 3112 3121 3132 3137 3137<br>3139 3139 3140 3141 3144 3145 3146 3148 3149 3150 3160 3161 3168 3175<br>3179 3181 3181 3181 3187 3189 3190 3190 3202 3204 3208 3208 3209 3213<br>3215 3217 3226 3226 3230 3234 |
| <b>TS3</b>                         | -242 13 21 30 38 43 47 48 49 54 58 61 66 68<br>74 77 82 86 94 96 99 104 104 112 114 117 126 130                                                                                                                                                                                                                                                                                                                                                                                                                                                                                                                                                                                                                                                                                                                                                                                                                                                                                                                                                                                                                                                                                                                                                                                                                                                                                                                                                                                                                                                                                                                                                                    |

|          |                                                                                                                                                                                                                                                                                                                                                                                                                                                                                                                                                                                                                                                                                                                                                                                                                                                                                                                                                                                                                                                                                                                                                                                                                                                                                                                                                                                                                                                                                                                                                                                                                                                                                                                             |
|----------|-----------------------------------------------------------------------------------------------------------------------------------------------------------------------------------------------------------------------------------------------------------------------------------------------------------------------------------------------------------------------------------------------------------------------------------------------------------------------------------------------------------------------------------------------------------------------------------------------------------------------------------------------------------------------------------------------------------------------------------------------------------------------------------------------------------------------------------------------------------------------------------------------------------------------------------------------------------------------------------------------------------------------------------------------------------------------------------------------------------------------------------------------------------------------------------------------------------------------------------------------------------------------------------------------------------------------------------------------------------------------------------------------------------------------------------------------------------------------------------------------------------------------------------------------------------------------------------------------------------------------------------------------------------------------------------------------------------------------------|
|          | <p>132 135 139 145 145 156 159 164 165 167 174 176 177 182<br/> 188 192 193 199 202 206 208 212 215 222 227 234 235 245<br/> 255 263 268 277 282 284 289 293 295 298 305 306 312 315<br/> 318 327 331 371 379 382 386 403 410 414 418 423 431 458<br/> 483 485 507 538 541 549 549 555 558 562 563 564 581 595<br/> 600 610 612 615 625 627 630 631 632 635 636 642 647 680<br/> 690 694 701 706 709 713 714 717 718 740 755 771 779 786<br/> 789 796 802 811 825 825 831 836 853 856 858 859 866 876<br/> 877 891 921 922 925 925 960 965 968 972 972 974 978 986<br/> 987 989 989 991 991 1016 1017 1017 1018 1048 1049 1051 1053 1058<br/> 1059 1060 1061 1062 1064 1065 1067 1074 1074 1083 1095 1096 1097 1101<br/> 1114 1116 1117 1121 1128 1132 1164 1194 1195 1196 1196 1196 1197 1198<br/> 1199 1205 1214 1216 1220 1223 1242 1267 1281 1308 1311 1319 1333 1338<br/> 1342 1343 1369 1372 1372 1375 1379 1422 1423 1424 1426 1430 1433 1435<br/> 1436 1440 1444 1455 1455 1460 1461 1475 1476 1478 1479 1480 1485 1486<br/> 1488 1488 1489 1489 1490 1492 1493 1495 1496 1499 1503 1504 1505 1510<br/> 1513 1514 1517 1519 1520 1523 1524 1528 1529 1531 1533 1536 1537 1539<br/> 1540 1550 1552 1557 1559 1562 1589 1632 1634 1645 1646 1663 1666 1669<br/> 1670 1803 3034 3034 3035 3037 3038 3038 3039 3041 3043 3047 3050 3051<br/> 3058 3092 3093 3100 3100 3104 3105 3108 3111 3121 3126 3129 3132 3134<br/> 3137 3137 3138 3142 3143 3144 3147 3153 3154 3157 3158 3164 3168 3172<br/> 3181 3181 3183 3185 3188 3190 3192 3192 3198 3203 3204 3205 3209 3213<br/> 3214 3215 3224 3225 3230 3248</p>                                                                                                         |
| <b>3</b> | <p>19 28 31 37 46 52 53 55 56 68 69 74 79 80<br/> 84 86 90 91 97 104 108 108 111 117 121 132 135 137<br/> 143 144 147 154 157 158 163 169 171 174 177 180 184 189<br/> 189 194 198 207 208 217 218 221 226 232 234 251 256 260<br/> 268 275 279 283 286 292 295 300 301 302 303 311 314 319<br/> 329 367 376 381 384 390 398 401 411 415 418 423 431 481<br/> 497 528 535 547 551 554 557 560 564 566 566 579 608 614<br/> 617 619 626 627 629 632 633 634 639 640 653 667 690 695<br/> 713 715 716 718 718 720 724 742 756 770 772 785 791 797<br/> 810 827 829 833 834 846 857 858 859 861 866 870 882 888<br/> 914 916 925 928 935 950 967 968 971 974 977 980 987 989<br/> 990 991 991 997 1015 1017 1019 1019 1048 1049 1049 1057 1059 1060<br/> 1061 1061 1063 1065 1066 1068 1069 1070 1075 1096 1097 1100 1101 1105<br/> 1114 1115 1116 1124 1131 1134 1193 1196 1196 1197 1198 1199 1199 1200<br/> 1201 1216 1217 1219 1224 1233 1285 1308 1309 1310 1318 1337 1337 1341<br/> 1344 1364 1371 1375 1379 1379 1382 1423 1425 1425 1427 1430 1432 1436<br/> 1438 1439 1443 1455 1456 1460 1460 1475 1478 1479 1479 1481 1484 1485<br/> 1487 1488 1489 1490 1492 1493 1494 1495 1497 1501 1501 1504 1505 1507<br/> 1509 1512 1514 1516 1517 1520 1522 1526 1529 1530 1531 1535 1537 1538<br/> 1543 1545 1547 1550 1558 1559 1574 1597 1628 1644 1646 1648 1659 1670<br/> 1671 1673 3027 3030 3031 3032 3033 3035 3040 3041 3042 3043 3047 3048<br/> 3059 3084 3087 3092 3093 3101 3106 3116 3116 3119 3121 3124 3127 3130<br/> 3133 3135 3137 3138 3139 3141 3143 3152 3155 3159 3162 3168 3169 3183<br/> 3183 3184 3184 3188 3190 3191 3191 3197 3199 3203 3205 3206 3209 3210<br/> 3213 3213 3220 3222 3227 3231</p> |

**Table S3.** The energies, enthalpies and free energies (in au at 298 K) and corresponding relative values (in kcal/mol ) for **2**+Me<sub>3</sub>SiCHN<sub>2</sub>, obtained with B3PW91-PCM+D3 method

| species                                      | E                  | H                  | G (gas)            | G (sol)            |
|----------------------------------------------|--------------------|--------------------|--------------------|--------------------|
| <b>2</b>                                     | -1894.67895        | -1893.79112        | -1893.92362        | -1893.91355        |
| Me <sub>3</sub> SiCHN <sub>2</sub>           | -557.28607         | -557.13860         | -557.18644         | -557.17631         |
| <b>2</b> +Me <sub>3</sub> SiCHN <sub>2</sub> | -2451.96502(0.0)   | -2450.92972(0.0)   | -2451.11006(0.0)   | -2451.08986(0.0)   |
| <b>COM3</b>                                  | -2451.98585(-13.1) | -2450.94805(-11.5) | -2451.10651(2.2)   | -2451.09662(-4.2)  |
| <b>TS3</b>                                   | -2451.95400(6.9)   | -2450.91741(7.7)   | -2451.07265(23.5)  | -2451.06283(17.0)  |
| <b>3</b>                                     | -2452.04723(-51.6) | -2451.00721(-48.6) | -2451.15952(-31.0) | -2451.14954(-37.4) |

**Table S4.** The optimized Cartesian Coordinates (in Å) and structures (the hydrogen atoms omitted for clarity) of  $(\eta^5\text{-C}_5\text{Me}_5)_2\text{U}(\eta^2\text{-C}_4\text{Ph}_4)$ , obtained with B3PW91-PCM+D3 method.

| Species                                        | Cartesian coordinates |          |          |          |  |
|------------------------------------------------|-----------------------|----------|----------|----------|--|
| $\text{Cp}^*_2\text{U}(\text{C}_4\text{Ph}_4)$ | C                     | 0.00000  | -2.79241 | 1.07504  |  |
|                                                | C                     | -1.35878 | -2.46531 | 1.36391  |  |
|                                                | C                     | -1.40951 | -1.93926 | 2.68729  |  |
|                                                | C                     | -0.08428 | -1.94811 | 3.21661  |  |
|                                                | C                     | 0.78350  | -2.48113 | 2.22018  |  |
|                                                | C                     | 0.43745  | -3.56704 | -0.13176 |  |
|                                                | H                     | 0.13642  | -4.62146 | -0.03997 |  |
|                                                | H                     | 1.52221  | -3.54537 | -0.25827 |  |
|                                                | H                     | -0.01081 | -3.18088 | -1.05347 |  |
|                                                | C                     | -2.50795 | -2.89035 | 0.49219  |  |
|                                                | H                     | -2.48395 | -3.97964 | 0.34838  |  |
|                                                | H                     | -2.47949 | -2.43153 | -0.50239 |  |
|                                                | H                     | -3.47796 | -2.64944 | 0.93597  |  |
|                                                | C                     | -2.64096 | -1.56849 | 3.46704  |  |
|                                                | H                     | -3.55343 | -1.73193 | 2.88608  |  |
|                                                | H                     | -2.64904 | -0.51945 | 3.79144  |  |
|                                                | H                     | -2.72558 | -2.17822 | 4.37612  |  |
|                                                | C                     | 0.29106  | -1.71079 | 4.65115  |  |
|                                                | H                     | -0.45742 | -1.11169 | 5.17633  |  |
|                                                | H                     | 1.25772  | -1.20492 | 4.76079  |  |
|                                                | H                     | 0.37589  | -2.66652 | 5.18899  |  |
|                                                | C                     | 2.23069  | -2.82332 | 2.43024  |  |
|                                                | H                     | 2.32692  | -3.79584 | 2.93495  |  |
|                                                | H                     | 2.74440  | -2.08996 | 3.06279  |  |
|                                                | H                     | 2.78254  | -2.88350 | 1.48877  |  |
|                                                | C                     | -3.70124 | 0.34988  | 0.33156  |  |
|                                                | H                     | -3.35522 | -0.45645 | 0.97014  |  |
|                                                | C                     | -5.00321 | 0.82368  | 0.47693  |  |
|                                                | H                     | -5.65826 | 0.37742  | 1.22211  |  |
|                                                | C                     | -5.46019 | 1.87197  | -0.32008 |  |
|                                                | H                     | -6.47241 | 2.25213  | -0.20694 |  |
|                                                | C                     | -4.59325 | 2.43167  | -1.26078 |  |
|                                                | H                     | -4.92890 | 3.25687  | -1.88525 |  |
| C                                              | -3.30004              | 1.94085  | -1.41729 |          |  |
| H                                              | -2.65198              | 2.39140  | -2.16114 |          |  |
| C                                              | -2.81316              | 0.87505  | -0.62787 |          |  |
| C                                              | -1.42488              | 0.37335  | -0.68757 |          |  |
| C                                              | -0.72307              | 0.19520  | -1.85981 |          |  |
| C                                              | -1.38230              | 0.38198  | -3.19590 |          |  |
| C                                              | -0.96887              | 1.38403  | -4.08650 |          |  |
| H                                              | -0.13067              | 2.02273  | -3.82068 |          |  |
| C                                              | -1.61912              | 1.57349  | -5.30391 |          |  |
| H                                              | -1.28506              | 2.36086  | -5.97564 |          |  |
| C                                              | -2.68976              | 0.75416  | -5.66390 |          |  |
| H                                              | -3.19345              | 0.89729  | -6.61676 |          |  |
| C                                              | -3.10681              | -0.25083 | -4.79171 |          |  |
| H                                              | -3.93955              | -0.89648 | -5.06108 |          |  |
| C                                              | -2.46197              | -0.42970 | -3.56909 |          |  |
| H                                              | -2.79950              | -1.20658 | -2.88764 |          |  |
| U                                              | 0.00000               | 0.00000  | 1.22501  |          |  |
| C                                              | 3.70124               | -0.34988 | 0.33156  |          |  |
| H                                              | 3.35522               | 0.45645  | 0.97014  |          |  |

|   |          |          |          |
|---|----------|----------|----------|
| C | 5.00321  | -0.82368 | 0.47693  |
| H | 5.65826  | -0.37742 | 1.22211  |
| C | 5.46019  | -1.87197 | -0.32008 |
| H | 6.47241  | -2.25213 | -0.20694 |
| C | 4.59325  | -2.43167 | -1.26078 |
| H | 4.92890  | -3.25687 | -1.88525 |
| C | 3.30004  | -1.94085 | -1.41729 |
| H | 2.65198  | -2.39140 | -2.16114 |
| C | 2.81316  | -0.87505 | -0.62787 |
| C | 1.42488  | -0.37335 | -0.68757 |
| C | 0.72307  | -0.19520 | -1.85981 |
| C | 1.38230  | -0.38198 | -3.19590 |
| C | 0.96887  | -1.38403 | -4.08650 |
| H | 0.13067  | -2.02273 | -3.82068 |
| C | 1.61912  | -1.57349 | -5.30391 |
| H | 1.28506  | -2.36086 | -5.97564 |
| C | 2.68976  | -0.75416 | -5.66390 |
| H | 3.19345  | -0.89729 | -6.61676 |
| C | 3.10681  | 0.25083  | -4.79171 |
| H | 3.93955  | 0.89648  | -5.06108 |
| C | 2.46197  | 0.42970  | -3.56909 |
| H | 2.79950  | 1.20658  | -2.88764 |
| C | 0.00000  | 2.79241  | 1.07504  |
| C | 1.35878  | 2.46531  | 1.36391  |
| C | 1.40951  | 1.93926  | 2.68729  |
| C | 0.08428  | 1.94811  | 3.21661  |
| C | -0.78350 | 2.48113  | 2.22018  |
| C | -0.43745 | 3.56704  | -0.13176 |
| H | -0.13642 | 4.62146  | -0.03997 |
| H | -1.52221 | 3.54537  | -0.25827 |
| H | 0.01081  | 3.18088  | -1.05347 |
| C | 2.50795  | 2.89035  | 0.49219  |
| H | 2.48395  | 3.97964  | 0.34838  |
| H | 2.47949  | 2.43153  | -0.50239 |
| H | 3.47796  | 2.64944  | 0.93597  |
| C | 2.64096  | 1.56849  | 3.46704  |
| H | 3.55343  | 1.73193  | 2.88608  |
| H | 2.64904  | 0.51945  | 3.79144  |
| H | 2.72558  | 2.17822  | 4.37612  |
| C | -0.29106 | 1.71079  | 4.65115  |
| H | 0.45742  | 1.11169  | 5.17633  |
| H | -1.25772 | 1.20492  | 4.76079  |
| H | -0.37589 | 2.66652  | 5.18899  |
| C | -2.23069 | 2.82332  | 2.43024  |
| H | -2.32692 | 3.79584  | 2.93495  |
| H | -2.74440 | 2.08996  | 3.06279  |
| H | -2.78254 | 2.88350  | 1.48877  |
